# Supplementary material for: Super-resolution imaging of a 2.5 kb non-repetitive DNA in situ in the nuclear genome using molecular beacon probes
Source: eLife. 2017 May 9;6:e21660. doi: 10.7554/eLife.21660 (PMC5433842; doi:10.7554/eLife.21660)
Supplement: Figure 1—source data 1. — Design of 29 Viral_MBs are shown in the table. Each Viral_MB was a 56-nt oligonucleotide composed of a 42-nt hybridizing region (upper-case) and two 7-nt flanking arms (lower-case). The hybridizing region melting temperature (hybridizing region Tm) was the temperature at which the hybridizing region dissociated from the complementary target sequence in the genome (denoted as sense/antisense stand as +/-). The arm melting temperature (arm Tm) was the temperature at which the two flanking arms dissociated from each other. The melting temperature (Tm) values were obtained from DINAMelt’s online ‘Quickfold Prediction’ tool. All MB sequences were BLASTed against the human genome and transcripts, and the maximum identical sequence was restrained to 22 nt. DOI: http://dx.doi.org/10.7554/eLife.21660.003 [file elife-21660-fig1-data1.xlsx]

## Sheet: Sheet1
	Hybridizing region Tm (℃)	Arm Tm (℃)	Hybridizing target strand (+/-)	Sequence
Viral_MB(1)	80	55.6	-	cggcctgGCCTCCCCGCATCGATACCGTCGACCTCGATCGAGACCTAGAcaggccg
Viral_MB(2)	82	53.1	-	cgtgcgcTACGTCCCTTCGGCCCTCAATCCAGCGGACCTTCCTTCCCGCgcgcacg
Viral_MB(3)	78	56.1	-	cggcacgTGGGCACTGACAATTCCGTGGTGTTGTCGGGGAAATCATCGTcgtgccg
Viral_MB(4)	80	55.4	-	cggccgaTTGCCACCACCTGTCAGCTCCTTTCCGGGACTTTCGCTTTCCtcggccg
Viral_MB(5)	75	55.1	-	cgggcagGGCCGCGACTCTAGATCATAATCAGCCATACAATTCGTCGAGctgcccg
Viral_MB(6)	83	58.2	-	cggcgcaCGTGCTGCTGCCCGACAACCACTACCTGAGCACCCAGTCCGCtgcgccg
Viral_MB(7)	84	59.1	-	cgtcgggTGCAGCTCGCCGACCACTACCAGCAGAACACCCCCATCGGCGcccgacg
Viral_MB(8)	78	56.8	-	cgcgggtAAGGTGAACTTCAAGATCCGCCACAACATCGAGGACGGCAGCacccgcg
Viral_MB(9)	76	55.9	-	cggtgcgCCACAACGTCTATATCATGGCCGACAAGCAGAAGAACGGCATcgcaccg
Viral_MB(10)	79	52.9	-	cgaccggCACCATCTTCTTCAAGGACGACGGCAACTACAAGACCCGCGCccggtcg
Viral_MB(11)	79	58.5	-	cgcggctCACATGAAGCAGCACGACTTCTTCAAGTCCGCCATGCCCGAAagccgcg
Viral_MB(12)	82	54.2	-	cgctcggACCCTCGTGACCACCCTGACCTACGGCGTGCAGTGCTTCAGCccgagcg
Viral_MB(13)	82	55.3	-	cgctggcTGACCCTGAAGTTCATCTGCACCACCGGCAAGCTGCCCGTGCgccagcg
Viral_MB(14)	83	56.3	-	cggacgcGCCCATCCTGGTCGAGCTGGACGGCGACGTAAACGGCCACAAgcgtccg
Viral_MB(15)	83	53.1	-	cgcgcgtACCGGTCGCCACCATGGTGAGCAAGGGCGAGGAGCTGTTCACacgcgcg
Viral_MB(16)	82	55.7	-	cgccgtgAGCTTCGAATTCTGCAGTCGACGGTACCGCGGGCCCGGGATCcacggcg
Viral_MB(17)	79	57.2	-	cgcgtcgGTGAACCGTCAGATCCGCTAGCGCTACCGGACTCAGATCTCGcgacgcg
Viral_MB(18)	77	56.4	-	cgcggtcGCAAATGGGCGGTAGGCGTGTACGGTGGGAGGTCTATATAAGgaccgcg
Viral_MB(19)	76	53.8	-	cgagggcTCAACGGGACTTTCCAAAATGTCGTAACAACTCCGCCCCATTgccctcg
Viral_MB(20)	76	55.8	-	cgggcgtCAAGTCTCCACCCCATTGACGTCAATGGGAGTTTGTTTTGGCacgcccg
Viral_MB(21)	79	56.4	-	cgtcggcGGCAGTACATCAATGGGCGTGGATAGCGGTTTGACTCACGGGgccgacg
Viral_MB(22)	72	53.4	-	cgggtccGGGACTTTCCTACTTGGCAGTACATCTACGTATTAGTCATCGggacccg
Viral_MB(23)	74	56.5	-	cggcagcCCACTTGGCAGTACATCAAGTGTATCATATGCCAAGTACGCCgctgccg
Viral_MB(24)	73	55.1	-	cgctgggGACGTATGTTCCCATAGTAACGCCAATAGGGACTTTCCATTGcccagcg
Viral_MB(25)	81	54.2	-	cggtgccTAACTTACGGTAAATGGCCCGCCTGGCTGACCGCCCAACGACggcaccg
Viral_MB(26)	74	55.3	-	cgtggcgTTACGGGGTCATTAGTTCATAGCCCATATATGGAGTTCCGCGcgccacg
Viral_MB(27)	76	54.2	-	cgagccgATTACAGGGACAGCAGAGATCCAGTTTGGTTAGTACCGGGCCcggctcg
Viral_MB(28)	79	55.9	-	cgtcgcgATTAGTGAACGGATCGGCACTGCGTGCGCCAATTCTGCAGACcgcgacg
Viral_MB(29)	75	56.6	-	cgcgcagCAGGGATATTCACCATTATCGTTTCAGACCCACCTCCCAACCctgcgcg
