# Supplementary material for: Super-resolution imaging of a 2.5 kb non-repetitive DNA in situ in the nuclear genome using molecular beacon probes
Source: eLife. 2017 May 9;6:e21660. doi: 10.7554/eLife.21660 (PMC5433842; doi:10.7554/eLife.21660)
Supplement: Figure 1—source data 2. — Fluorescence spectrophotometry measurements of 29 individual Viral_MB probes in FISH hybridization buffer with excessive amounts of the corresponding CS or NCSs at room temperature or averaged reading of the whole probe set at different temperature (42°C to 14°C). DOI: http://dx.doi.org/10.7554/eLife.21660.004 [file elife-21660-fig1-data2.xlsx]

## Sheet: 1d
	Fluorescence intensity (Unit)
	MB+NCS		MB+CS
Individual MB	Average	SEM	Average	SEM
1	4.09993	0.2556	43.8226	0.6466
2	7.78232	0.20975	38.3986	0.29122
3	4.62588	0.17962	40.7578	0.5236
4	15.1395	4.41293	36.6381	0.58269
5	5.17112	0.29945	40.1085	0.5417
6	8.03931	0.22908	40.527	0.81653
7	7.92711	0.32777	40.6298	0.449
8	8.1754	0.20643	42.8048	0.6315
9	8.57505	0.26897	41.0484	0.5034
10	9.55819	0.27828	39.4912	0.3492
11	7.33764	0.26298	43.6461	1.45002
12	7.90643	0.25965	42.4042	0.3045
13	11.0731	0.26304	40.6108	0.78771
14	4.14866	0.19234	41.7782	0.78507
15	5.45177	0.29785	38.9692	0.70305
16	11.0266	0.33708	38.6867	0.90794
17	10.3907	0.26163	42.6246	0.96382
18	5.43022	0.24758	35.8631	0.42311
19	9.27631	0.28042	38.3054	1.16553
20	3.89181	0.28089	45.1236	1.45778
21	5.66413	0.31808	40.2359	0.75319
22	9.91484	0.31824	40.4243	0.6397
23	3.62816	0.21974	44.594	0.76954
24	10.2734	0.3919	42.8566	0.53127
25	6.87043	0.21259	40.7111	0.57061
26	6.09625	0.32943	35.327	1.17774
27	8.65041	0.32413	37.2554	0.58182
28	6.9857	0.2884	36.16	1.59907
29	6.59571	0.3639	36.8157	0.63415

## Sheet: 1e
		Fluorescence intensity (Unit)
		MB+NSC		MB+CS
	Temperature(degree Celsius)	Averaged	SEM	Average	SEM
	14	6.09408	0.2114	42.1668	0.2299
	18	6.68921	0.2132	41.0833	0.2131
	22	7.57607	0.2214	40.2282	0.2226
	26	8.04075	0.2252	38.9368	0.2008
	30	8.81031	0.2342	37.1285	0.2076
	34	9.53342	0.2397	35.7552	0.2135
	38	10.8818	0.2545	33.8394	0.1944
	42	13.9486	0.4085	30.55	0.3716
