# Supplementary material for: Super-resolution imaging of a 2.5 kb non-repetitive DNA in situ in the nuclear genome using molecular beacon probes
Source: eLife. 2017 May 9;6:e21660. doi: 10.7554/eLife.21660 (PMC5433842; doi:10.7554/eLife.21660)
Supplement: Figure 2—source data 1. — Event number per unit area (event number/µm2) obtained under different STORM imaging conditions in 2b, c, d, e and g. DOI: http://dx.doi.org/10.7554/eLife.21660.009 [file elife-21660-fig2-data1.xlsx]

## Sheet: 2b
		Alexa-647		10T
		Event number/area(μm^2)		Event number/area(μm^2)
		average	SEM	average	SEM	averaged FDR
at 20Hz	Condition I	12.51	0.16	6.89	0.78	0.551
	Condition II	12.3	0.59	6.89	0.56	0.56
	Condition III	15.49	1.73	5.34	0.77	0.345
	Condition IV	16.29	2.61	6.14	0.63	0.377
at 60 Hz	Condition V	21.9	0.9	1.48	0.26	0.068
	Condition VI	20.42	1.28	2.22	1.12	0.109
	Condition VII	30.03	1.61	0.91	0.18	0.03
	Condition VIII	33.21	2.16	0.95	0.09	0.029
at 85 Hz	Condition IX	21.22	3.71	2.23	0.4	0.105
	Condition X	26.62	2.17	0.62	0.12	0.023
	Condition XI	23.96	2.98	0.26	0.06	0.011
	Condition XII	38.42	6.12	0.33	0.06	0.009

## Sheet: 2c
		Alexa-647		10T
		Event number/area(μm^2)		Event number/area(μm^2)
		average	SEM	average	SEM	averaged FDR
at 60Hz	Condition VII	14.98	1.01	3.97	1.5	0.265
	Condition VIII	18.85	1.55	4.39	1.69	0.233
at 85 Hz	Condition XI	11.36	0.99	0.94	0.38	0.083
	Condition XII	12.29	2.45	0.4	0.2	0.032

## Sheet: 2d
		Nromalized event number (per 5 s time window)
		Condition IX		Condition X		Condition XI		Condition XII
	Time(s)	average	SEM	average	SEM	average	SEM	average	SEM
	5	1	0	1	0	1	0	1	0
	10	0.78187	0.07694	0.81755	0.03796	0.82955	0.04256	0.92799	0.01455
	15	0.60581	0.01842	0.68002	0.05237	0.69794	0.02783	0.81871	0.0352
	20	0.51678	0.05418	0.55908	0.06782	0.6005	0.05448	0.71275	0.0403
	25	0.51082	0.07627	0.50727	0.06159	0.45538	0.03587	0.64734	0.05613
	30	0.38145	0.04966	0.41281	0.0449	0.38377	0.04585	0.58572	0.05391
	35	0.34116	0.04449	0.41312	0.05141	0.41421	0.02636	0.47638	0.05725
	40	0.29928	0.02856	0.33792	0.03643	0.30636	0.04381	0.49786	0.03464
	45	0.2479	0.02742	0.31437	0.0326	0.28888	0.03821	0.43327	0.05062
	50	0.18176	0.02809	0.23585	0.03058	0.24127	0.02686	0.40899	0.00979
	55	0.22087	0.04216	0.23064	0.02959	0.26844	0.04153	0.3514	0.0185
	60	0.19069	0.03649	0.20516	0.00849	0.23014	0.04385	0.31573	0.02411
	65	0.16934	0.03928	0.20903	0.03893	0.19035	0.02205	0.34037	0.02412
	70	0.17311	0.02781	0.2072	0.02368	0.17064	0.0202	0.25088	0.01887
	75	0.12572	0.0329	0.18923	0.0194	0.16301	0.02568	0.24567	0.02004
	80	0.10462	0.02108	0.15461	0.01772	0.17725	0.01775	0.25096	0.01203
	85	0.12359	0.01045	0.1622	0.02348	0.16219	0.01519	0.24502	0.02137
	90	0.18171	0.05973	0.12583	0.00867	0.13168	0.01491	0.23385	0.02113
	95	0.16046	0.03908	0.12873	0.02231	0.13318	0.02397	0.23215	0.02174
	100	0.12459	0.05395	0.15189	0.00729	0.10999	0.00849	0.20243	0.03099
	105	0.14354	0.02785	0.12121	0.02307	0.12637	0.02549	0.22955	0.01596
	110	0.18909	0.1136	0.12263	0.02629	0.10531	0.0129	0.15588	0.0183
	115	0.1131	0.02994	0.10948	0.00365	0.10631	0.01021	0.18018	0.03452
	120	0.1256	0.02431	0.10444	0.0102	0.10067	0.01863	0.17123	0.01928
	125	0.10357	0.00483	0.12045	0.00958	0.09154	0.018	0.18441	0.02794
	130	0.10582	0.01367	0.08759	0.01189	0.11062	0.01372	0.16913	0.02503
	135	0.07292	0.01643	0.09282	0.00903	0.10355	0.01106	0.14558	0.01246
	140	0.07471	0.01219	0.06825	0.00413	0.10779	0.0094	0.1435	0.00996
	145	0.0956	0.03472	0.07598	0.01155	0.0793	0.01405	0.13397	0.01911
	150	0.15617	0.07022	0.08358	0.00706	0.05881	0.01257	0.15839	0.01408
	155	0.11641	0.076	0.0613	0.00606	0.08275	0.01041	0.14873	0.01161
	160	0.07991	0.04049	0.06297	0.00529	0.09301	0.025	0.12476	0.02019
	165	0.07257	0.02611	0.09566	0.01127	0.08456	0.01618	0.1342	0.01777
	170	0.06379	0.01644	0.07796	0.01157	0.07372	0.00636	0.097	0.02076
	175	0.07507	0.01825	0.05026	0.00748	0.07792	0.01566	0.09752	0.00837
	180	0.12126	0.06958	0.08159	0.02378	0.05209	0.01134	0.12851	0.01166

## Sheet: 2e
	Event number/area(μm^2)
	Unoptimized condition		Optimized condition
input of 80 pM	average	SEM	average	SEM
control	3.15	0.17	0.12	0.05
Alexa-647	3.08	0.17	5.32	0.35

## Sheet: 2g
	Event number/area(μm^2)
	Unoptimized condition		Optimized condition
Alexa-647 input	average	SEM	average	SEM
200 pM	5.06	0.52	12.04	1.17
2 nM	41.51	1.74	128.7	7.86
