# Supplementary material for: Super-resolution imaging of a 2.5 kb non-repetitive DNA in situ in the nuclear genome using molecular beacon probes
Source: eLife. 2017 May 9;6:e21660. doi: 10.7554/eLife.21660 (PMC5433842; doi:10.7554/eLife.21660)
Supplement: Figure 5—source data 1. — Design of 34 Nanog_MBs is shown in the table. Each Nanog_MB was a 56-nt oligonucleotide composed of a 42-nt hybridizing region (upper-cased) and two 7-nt flanking arms (lower-cased). The hybridizing region melting temperature (hybridizing region Tm) was the temperature at which the hybridizing region dissociated from the complementary target sequence in the genome (denoted as sense/antisense stand as +/-). The arm melting temperature (arm Tm) was the temperature at which the two flanking arms dissociated from each other. The melting temperature (Tm) values were obtained from DINAMelt’s online ‘Quickfold Prediction’ tool. All MB sequences were BLASTed against the mouse genome and transcripts, and the maximum identical sequence was restrained to 25 nt. DOI: http://dx.doi.org/10.7554/eLife.21660.013 [file elife-21660-fig5-data1.xlsx]

## Sheet: Sheet1
	Hybridizing region Tm (℃)	Arm Tm (℃)	Hybridizing target strand (+/-)	Sequence
Nanog_MB(1)	72	55.2	-	cgcctggGTTTAAACTTGTAAAACTCCAGTCGTGGGCTAAACTGTCTGGccaggcg
Nanog_MB(2)	80	54	-	cgctcggCTACTGTGTTCACGGACAGGTGCCAGCCCAGTGACCCAGAGCccgagcg
Nanog_MB(3)	78	57.4	+	cgccggtCCCAGGGCAGTGCTAGGTTTCGGGAGACAACTGAAAGGGAATaccggcg
Nanog_MB(4)	76	57.9	-	cggcgtgCCTGGAGCCCATCTCAGTCTGCCAGCGATTCTTTTCAAACAAcacgccg
Nanog_MB(5)	71	54.8	+	cgggctgTCTTGTAGCAACTCATAGATCTGCAAATACATGAACCTGTGGcagcccg
Nanog_MB(6)	78	54.9	-	cgggtcgGCCGCTCCCTGGATAGCGATGAATCCTTCAGCCTACTGTCCAcgacccg
Nanog_MB(7)	85	56	-	cggctgcAGGAGGCCAAGCGCCTTGTCCGCTCCGCACCACCCACCCATCgcagccg
Nanog_MB(8)	83	55.5	-	cgtccggGCGGGTGGTGATAAACCGGTGCACCTCGCGGCCTCCCGAATTccggacg
Nanog_MB(9)	76	54	-	cggctcgCAGGAGGTCCCAACTGTCCTTACTCACAGTTCATTCCAAGCCcgagccg
Nanog_MB(10)	78	56.9	-	cggtgcgGAAAAGGCCTTCCTAGCCCAAGGGTGGGAATGTTAAGGCTGGcgcaccg
Nanog_MB(11)	78	56	+	cggtggcGACCTAGGAGAGCCCAGTCACCCATCTGTGTGAGGTTTCCCAgccaccg
Nanog_MB(12)	78	57.9	-	cgtgcgcCTCTGACACCTCTGGGTCTTGCAAACCGGGTGCTCCACATATgcgcacg
Nanog_MB(13)	74	53.8	-	cgtcgggATAGATTTGGAATTAACCGTACAGCTGGCATGGCAGTGTTGGcccgacg
Nanog_MB(14)	73	55.6	+	cgtgccgTCTGACCTTCCTCTTGCTAATCCACCTTGAAGATCTCACATCcggcacg
Nanog_MB(15)	74	51.5	-	cgtcgcgGACCTTTCAGCAAGCAACCCTTCAACTGTGAGTTGCTAGTTAcgcgacg
Nanog_MB(16)	74	56.3	-	cgcgcgtAAGGGCAAACTGGCGACAGTAAACATAATTAGCTGACCCTTCacgcgcg
Nanog_MB(17)	74	56.3	+	cgtggcgGGCCTTTGAGATAGCAGATTGCCGACGGACTTTATTTCCTTTcgccacg
Nanog_MB(18)	75	58.3	-	cgcgggtGCCAGCCTTAACTCCTGCAAAGTTAAGCCCACAGTACTTGAAacccgcg
Nanog_MB(19)	74	56	+	cggtcgcCGTGCTCCGTCTCCTCGAGCCAACAAAGGAAGAAATAATTAAgcgaccg
Nanog_MB(20)	77	57.9	-	cgccgtgCCAGCAGGACAGGTGTCATGTCCTCCTCAGCAAAAGCTTCAAcacggcg
Nanog_MB(21)	79	55.8	+	cgtgggcAGAGCCCGGGAAGATGGAAAACCAGTTTCCTCCGGTCTCTGCgcccacg
Nanog_MB(22)	77	55.3	-	cggtcggCAGCCTTGTGCTTCGCGTGTGCTGTTGGAGCGATTTCGTTAAccgaccg
Nanog_MB(23)	74	55.9	-	cgtgcggCCGATCTTATGTCACCTCACCTGAGGACCCAGTTTGATCATTccgcacg
Nanog_MB(24)	72	57.9	-	cgctgcgGAATAGTACTTTTCACCATGGGTAAACTTGAACCCAGGTCTGcgcagcg
Nanog_MB(25)	80	50.9	+	cgcggtgGGCTGTACAGGGCAGTGAAGAGCCGTGAGGCTGAGCATGGAGcaccgcg
Nanog_MB(26)	75	56	-	cgctgggCCACACATCTGCACCCTTGCCTTGTAAACATCTGGCATAAGAcccagcg
Nanog_MB(27)	73	55.6	-	cgtcggcTGAAGGGACAGACACTTAAAGGGTCTTACTGCCCAGATACTTgccgacg
Nanog_MB(28)	75	56.1	+	cggtgccGGGAAGTCACTCTGCAGTTCATTCCTGGTGATAGGATGGTTGggcaccg
Nanog_MB(29)	74	56.1	-	cgggtgcAACAGGATAGATATTGGTGACTGAGGTTGGAAGACAGGCCTGgcacccg
Nanog_MB(30)	73	54.1	-	cgggctcCATGTCTTCTGTGGTGTCCAATTCTGTTCTCATGCATTTGCAgagcccg
Nanog_MB(31)	79	55.8	+	cggcgtcGGTAAATGGTACCCAGGCCCTTCCGGCCATCTCAGCTCTCTGgacgccg
Nanog_MB(32)	78	55.4	-	cgcggtcTCTGAGGCCGGAAGGAGACATCGCAAGCATCTTAGAGTGCAGgaccgcg
Nanog_MB(33)	70	53	-	cgggtccAACTTCCATATTGATTTCACAATTCTTCTGGGAGTAGCTCTCggacccg
Nanog_MB(34)	70	57.8	-	cgctggcATTCTCTCTGCTTATCCAATTATCCTCAGGTATGAAAGAGGAgccagcg
