# Supplementary material for: Super-resolution imaging of a 2.5 kb non-repetitive DNA in situ in the nuclear genome using molecular beacon probes
Source: eLife. 2017 May 9;6:e21660. doi: 10.7554/eLife.21660 (PMC5433842; doi:10.7554/eLife.21660)
Supplement: Figure 5—source data 2. — Fluorescence spectrophotometry measurements of 34 individual Nanog_MB probes in FISH hybridization buffer with excessive amounts of the corresponding CS or NCSs at room temperature or averaged reading of the whole probe set at different temperature (46°C to 14°C). DOI: http://dx.doi.org/10.7554/eLife.21660.014 [file elife-21660-fig5-data2.xlsx]

## Sheet: 2a
	Fluorescence intensity (Unit)
	MB+NCS		MB+CS
Individual MB	Average	SEM	Average	SEM
1	12.8599	0.37488	46.5872	0.56248
2	8.73147	0.28107	47.8258	0.69475
3	5.40813	0.22274	46.0284	0.42699
4	9.17436	0.38364	52.8143	1.10301
5	7.54127	0.21384	48.9013	1.34786
6	3.95532	0.15406	48.7887	0.74889
7	9.29656	0.26711	50.3624	0.88134
8	6.34606	0.2287	47.7332	0.44671
9	9.48745	0.31594	58.3208	1.04328
10	4.37017	0.231	48.3472	0.78184
11	4.52391	0.31843	51.9108	0.50729
12	9.78787	0.23231	50.7461	1.20822
13	6.81539	0.16107	53.8503	0.80969
14	8.33693	0.24813	47.2614	0.5958
15	9.79946	0.37253	44.8215	1.21569
16	8.3627	0.31102	45.3695	0.72129
17	6.68815	0.30775	47.3603	0.54737
18	7.32615	0.19304	50.2304	0.66166
19	11.708	0.35613	54.9414	0.80538
20	15.0351	0.49371	52.7081	1.96155
21	4.02285	0.23189	48.8906	0.62052
22	11.3762	0.34975	58.2155	0.61465
23	9.02064	0.27557	53.8359	0.34041
24	8.16147	0.44597	61.6998	4.59116
25	5.73439	0.23871	51.2998	0.54691
26	9.94714	0.21124	52.241	0.88924
27	5.34674	0.18226	50.7897	1.02436
28	4.30984	0.2076	49.2642	0.97907
29	6.08227	0.28151	53.7611	0.59467
30	16.667	0.36278	54.113	0.81929
31	6.74861	0.20335	53.5689	0.76535
32	3.78289	0.24944	42.8099	0.92849
33	12.145	0.31229	54.7447	0.92929
34	6.04824	0.14729	50.7752	0.76874

## Sheet: 2b
	Fluorescence intensity (Unit)
	MB+NSC		MB+CS
Temperature(degree Celsius)	Averaged	SEM	Average	SEM
14	6.82703	0.17306	51.0377	0.44846
18	7.81299	0.19245	50.6566	0.41806
22	8.01158	0.18954	50.4486	0.38327
26	8.26223	0.19746	47.0211	0.40279
30	9.27721	0.21376	44.9077	0.38965
34	10.7361	0.26177	42.6313	0.30094
38	12.1107	0.27888	41.3813	0.3026
42	13.4684	0.30046	40.0379	0.3402
46	15.7934	0.32548	38.2371	0.29872
